# Supplementary material
Source: MDPI journal article supplement (https://www.mdpi.com/2071-1050/13/3/1093)
Supplement: s1 [file s1]

Supplementary:  
The energy allocation Sankey diagrams of China's 29 provinces in 2016.

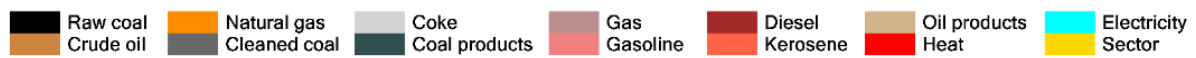

Figure S.1. The legend of energy varieties in energy allocation Sankey diagrams.

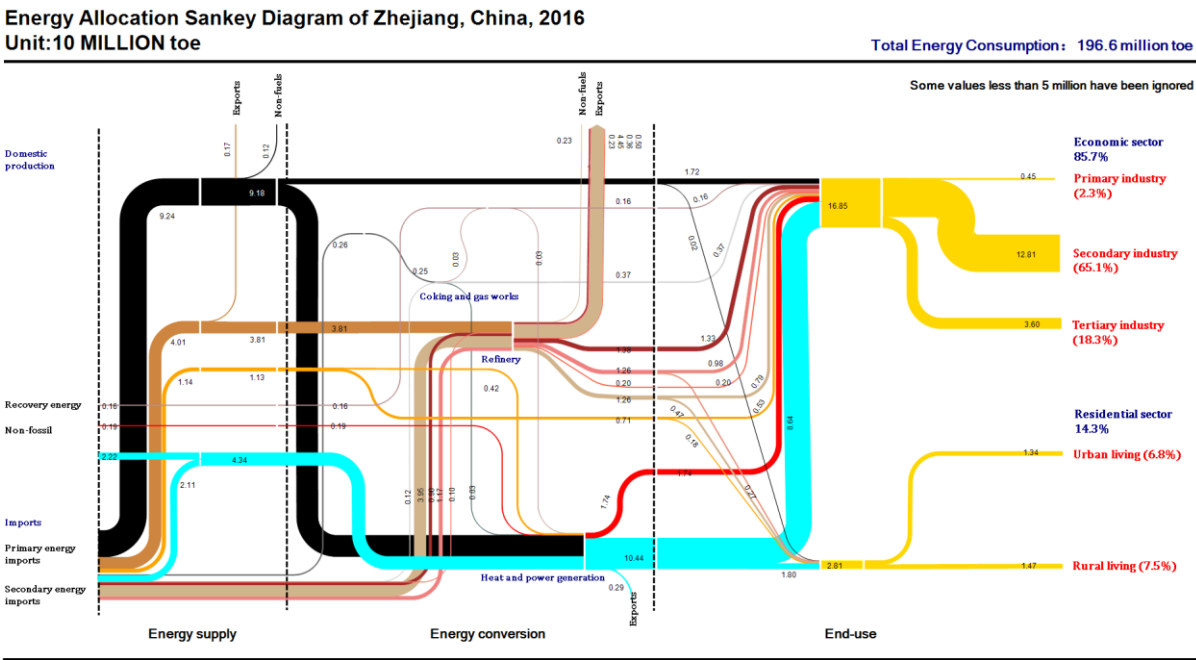

Figure S.2. Energy allocation Sankey diagram of Zhejiang in 2016.

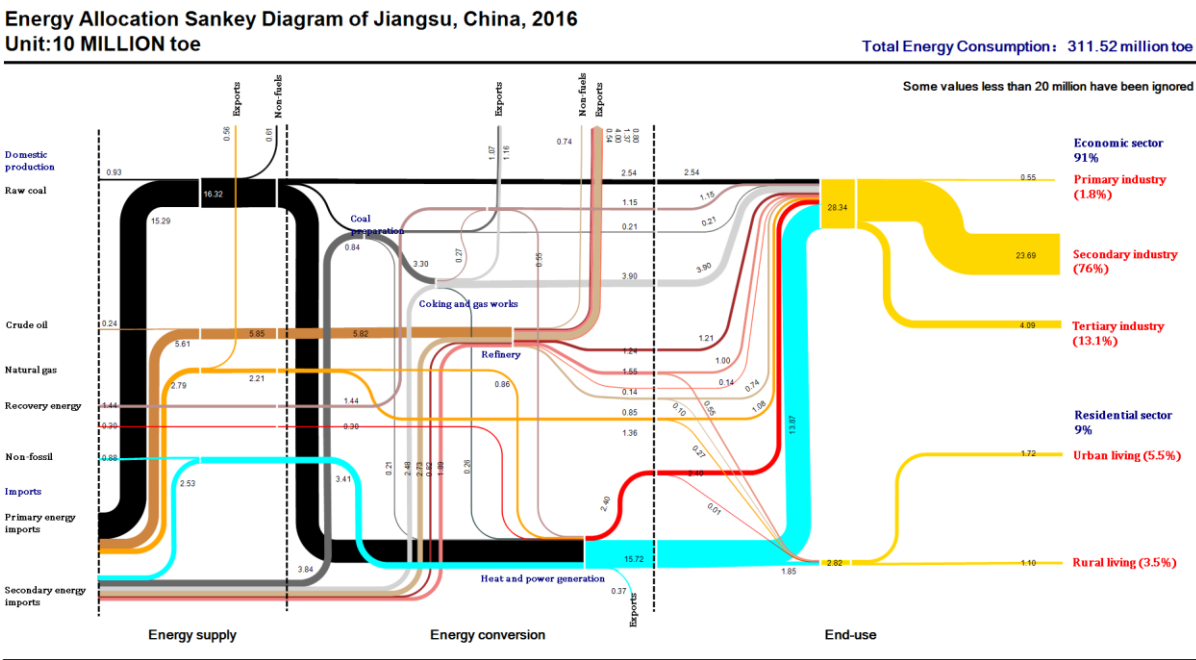

Figure S.3. Energy allocation Sankey diagram of Jiangsu in 2016.

Energy Allocation Sankey Diagram of Hebei, China, 2016  
Unit:10 MILLION toe

Total Energy Consumption: 323.85 million toe

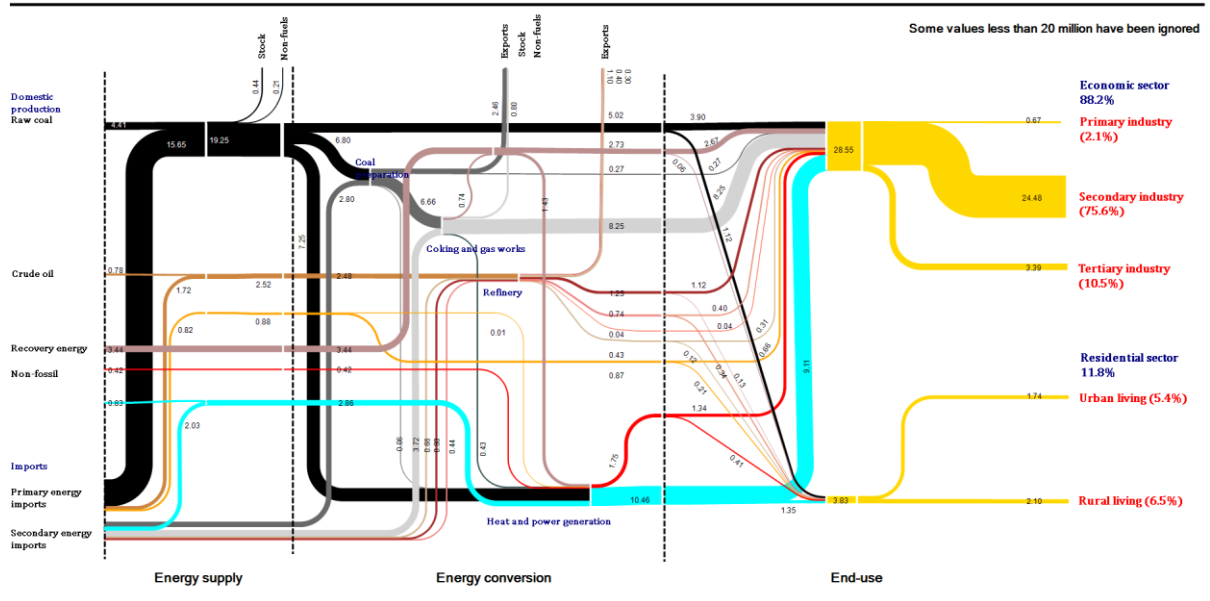

Figure S.4. Energy allocation Sankey diagram of Hebei in 2016.

Energy Allocation Sankey Diagram of Liaoning, China, 2016  
Unit:10 MILLION toe

Total Energy Consumption: 249.1 million toe

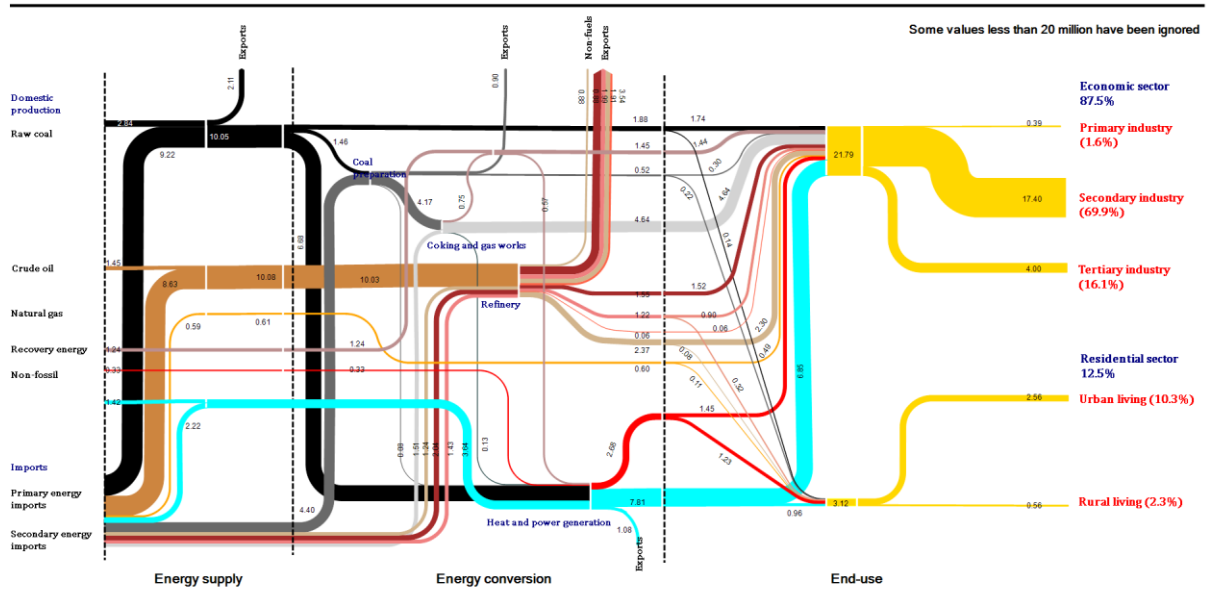

Figure S.5. Energy allocation Sankey diagram of Liaoning in 2016.

Energy Allocation Sankey Diagram of Jilin, China, 2016  
Unit: 10 MILLION toe

Total Energy Consumption: 90.71 million toe

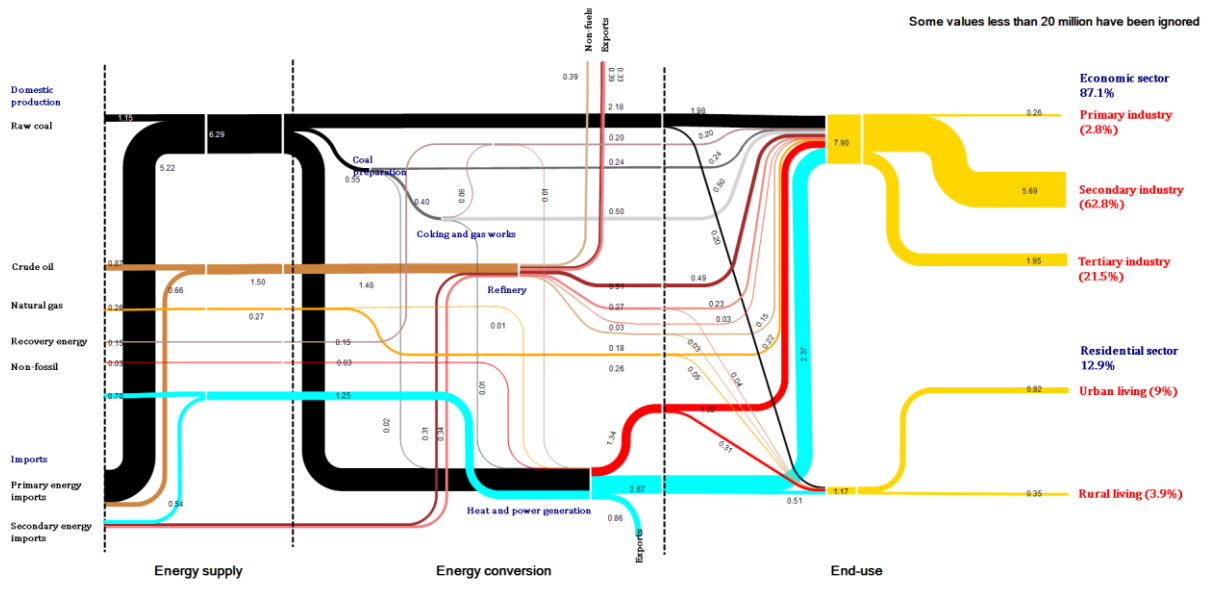

Figure S.6. Energy allocation Sankey diagram of Jilin in 2016.

Energy Allocation Sankey Diagram of Heilongjiang, China, 2016  
Unit: 10 MILLION toe

Total Energy Consumption: 123.56 million toe

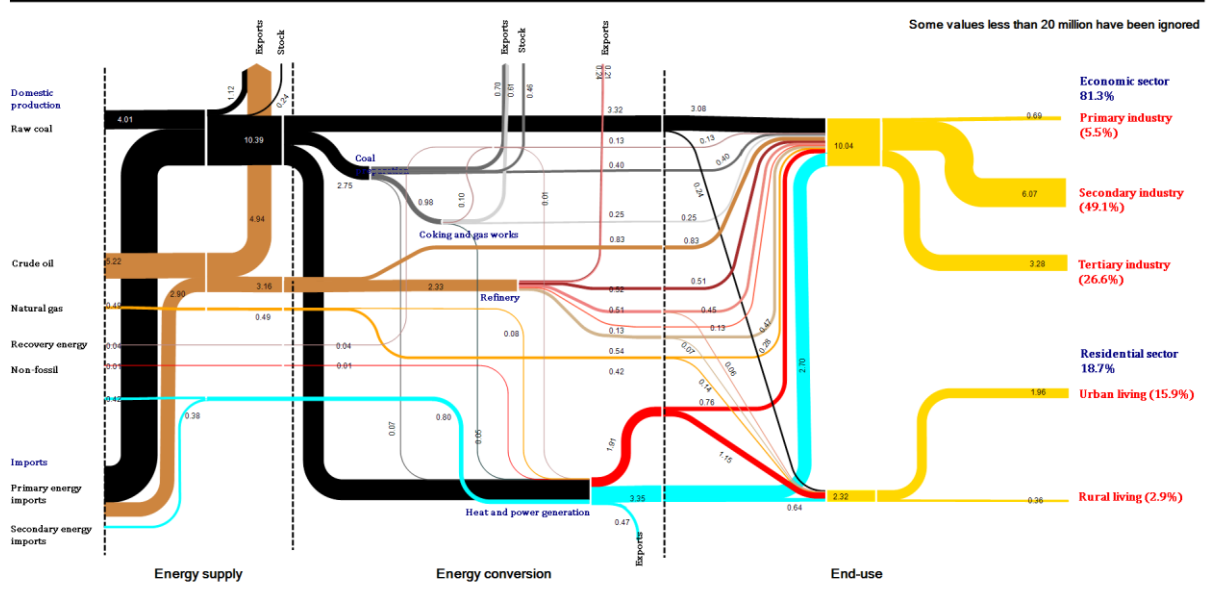

Figure S.7. Energy allocation Sankey diagram of Heilongjiang in 2016.

### Energy Allocation Sankey Diagram of Fujian, China, 2016 Unit:10 MILLION toe

Total Energy Consumption: 124.93 million toe

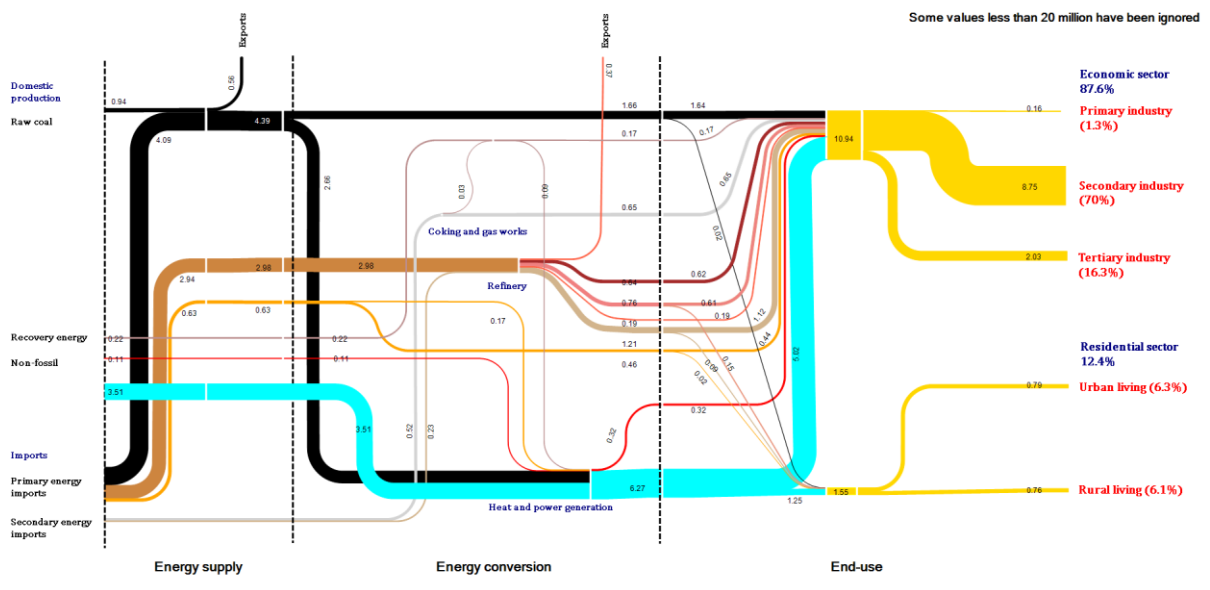

Figure S 8. Energy allocation Sankey diagram of Fujian in 2016.

### Energy Allocation Sankey Diagram of Jiangxi, China, 2016 Unit:10 MILLION toe

Total Energy Consumption: 93.73 million toe

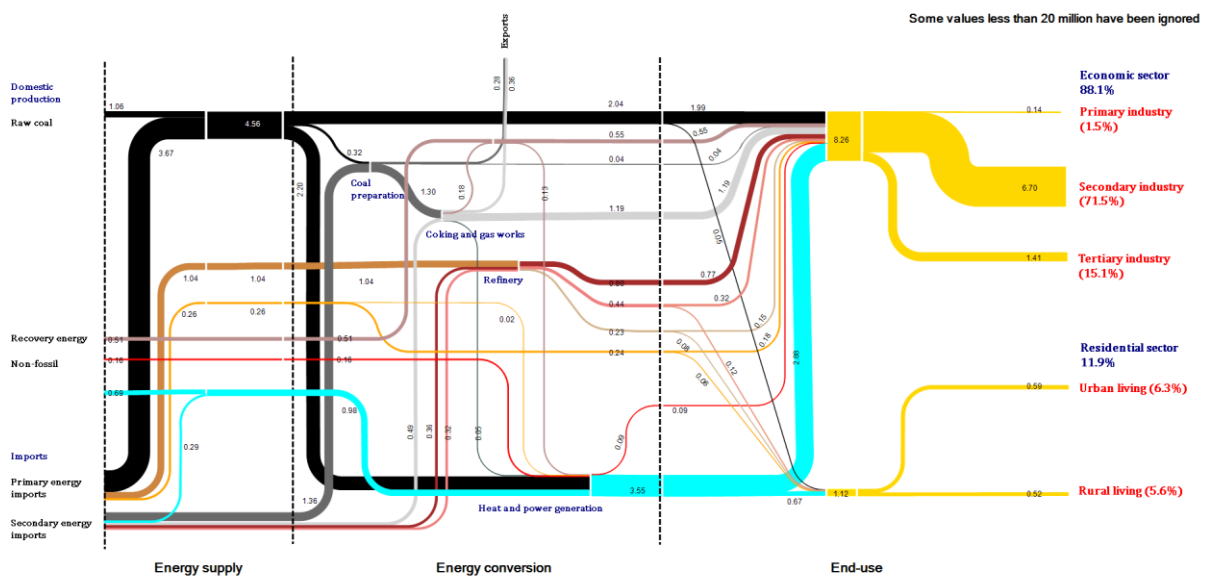

Figure S.9. Energy allocation Sankey diagram of Jiangxi in 2016.

### Energy Allocation Sankey Diagram of Hunan, China, 2016 Unit: 10 MILLION toe

Total Energy Consumption: 158.78 million toe

Some values less than 20 million have been ignored

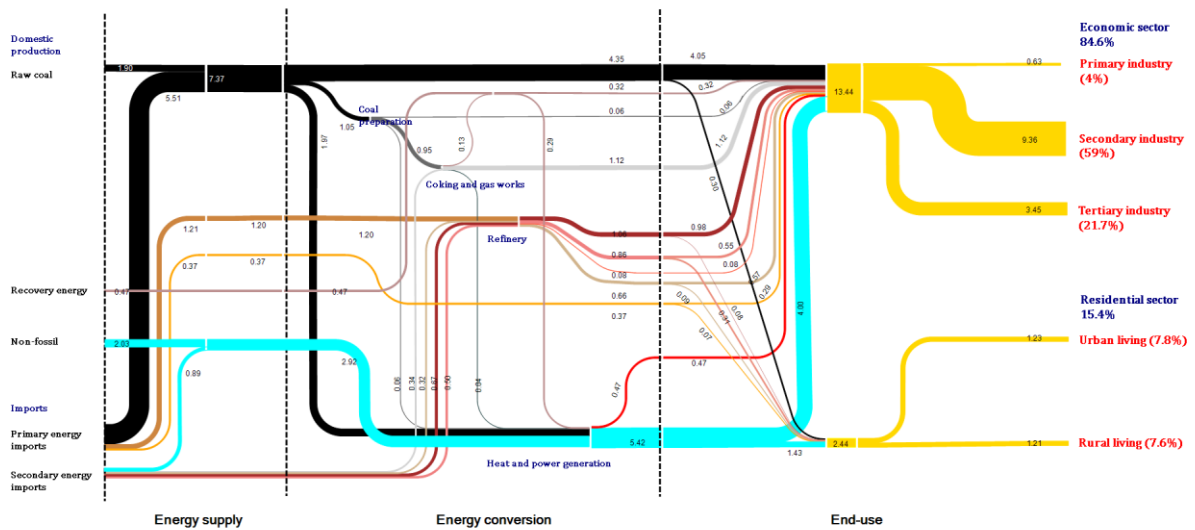

Figure S.10. Energy allocation Sankey diagram of Hunan in 2016.

### Energy Allocation Sankey Diagram of Guangxi, China, 2016 Unit: 10 MILLION toe

Total Energy Consumption: 108.63 million toe

Some values less than 5 million have been ignored

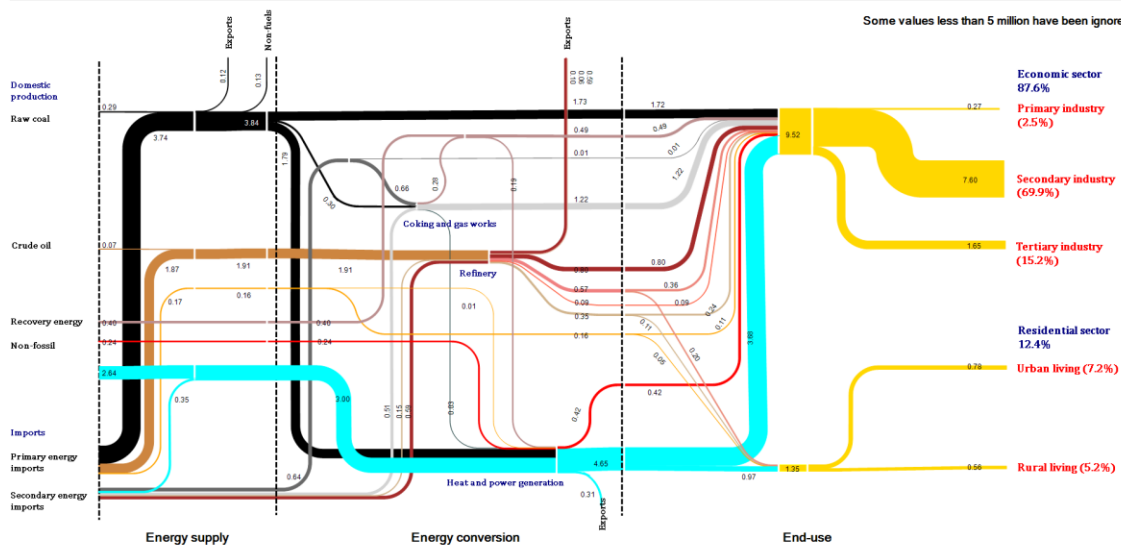

Figure S.11. Energy allocation Sankey diagram of Guangxi in 2016.

Energy Allocation Sankey Diagram of Tianjin, China, 2016  
Unit:10 MILLION toe

Total Energy Consumption: 79.45 million toe

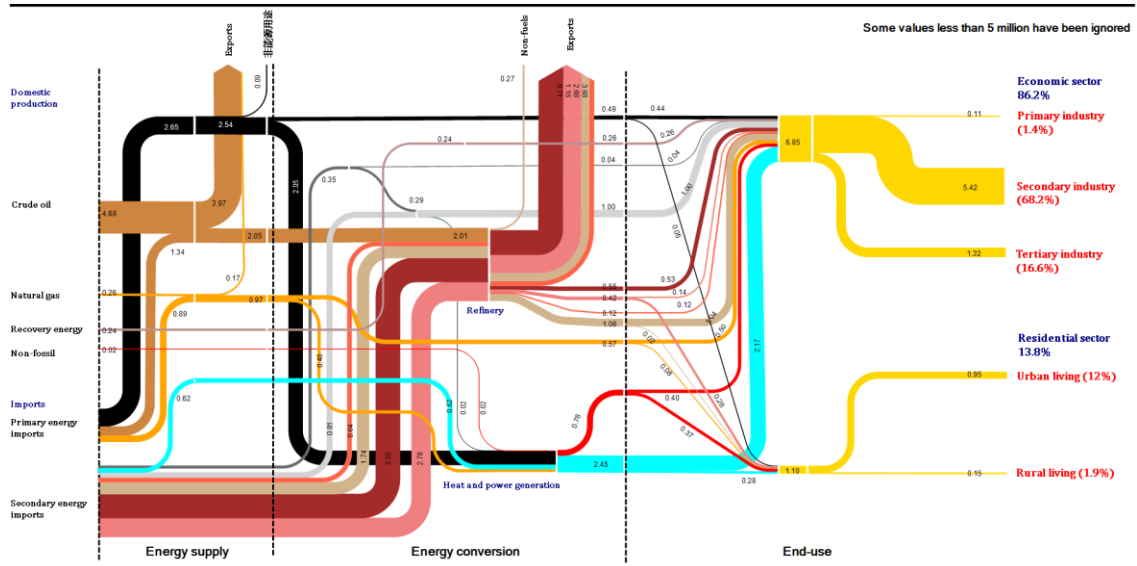

Figure S.12. Energy allocation Sankey diagram of Tianjin in 2016.

Energy Allocation Sankey Diagram of Shandong, China, 2016  
Unit:10 MILLION toe

Total Energy Consumption: 355.11 million toe

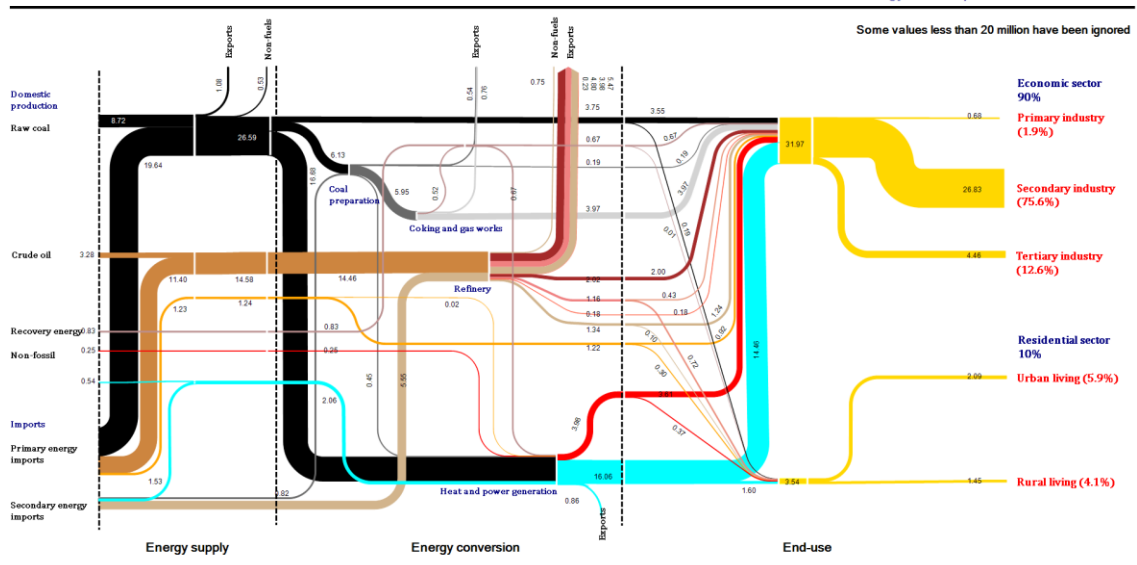

Figure S.13. Energy allocation Sankey diagram of Shandong in 2016.

Energy Allocation Sankey Diagram of Chongqing, China, 2016  
Unit:10 MILLION toe

Total Energy Consumption: 83.91 million toe

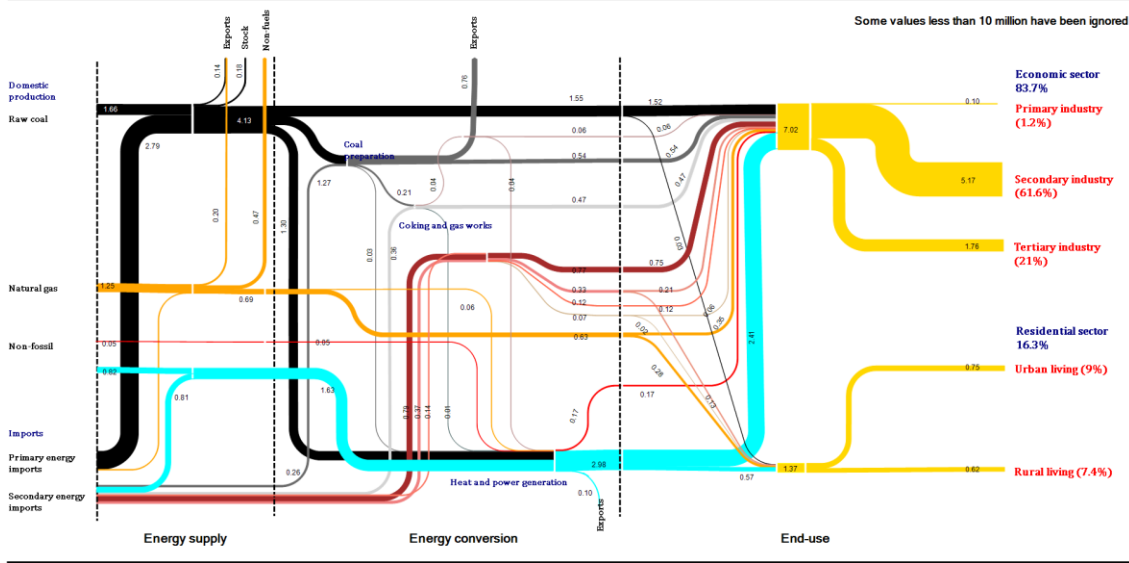

Figure S.14. Energy allocation Sankey diagram of Chongqing in 2016.

Energy Allocation Sankey Diagram of Hubei, China, 2016  
Unit:10 MILLION toe

Total Energy Consumption: 154.66 million toe

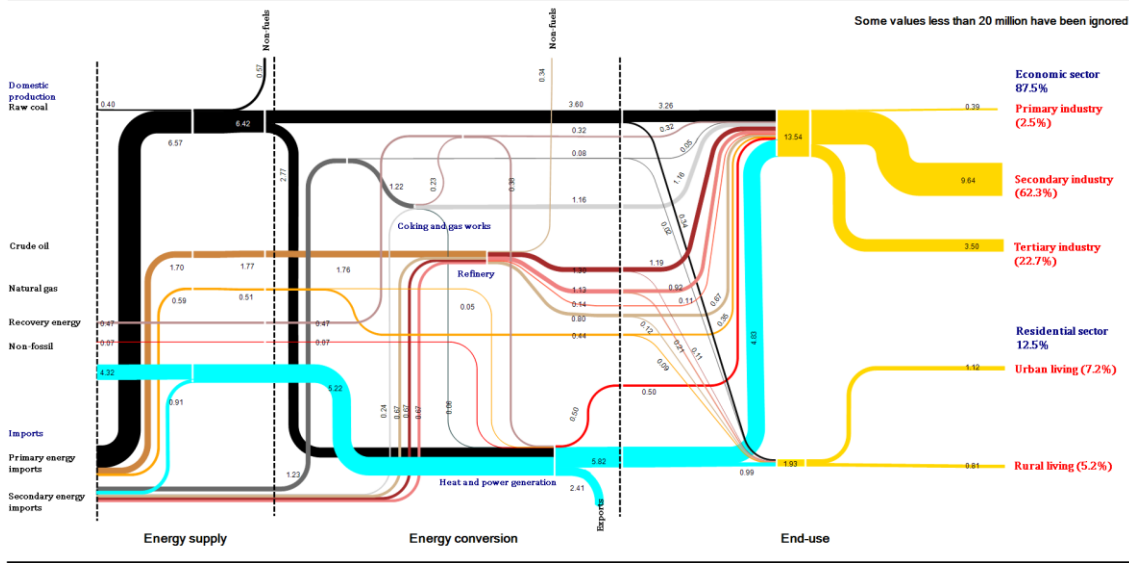

Figure S.15. Energy allocation Sankey diagram of Hubei in 2016.

## Unit:10 MILLION toe

Some values less than 20 million have been ignored

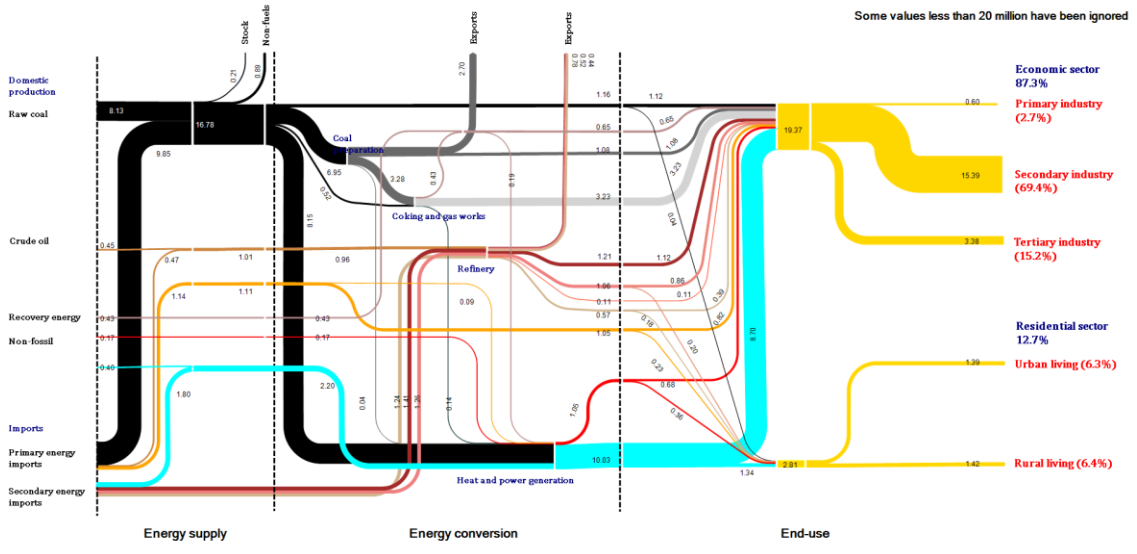

**Figure S.16.** Energy allocation Sankey diagram of Henan in 2016.

## Unit:10 MILLION toe

Some values less than 20 million have been ignored

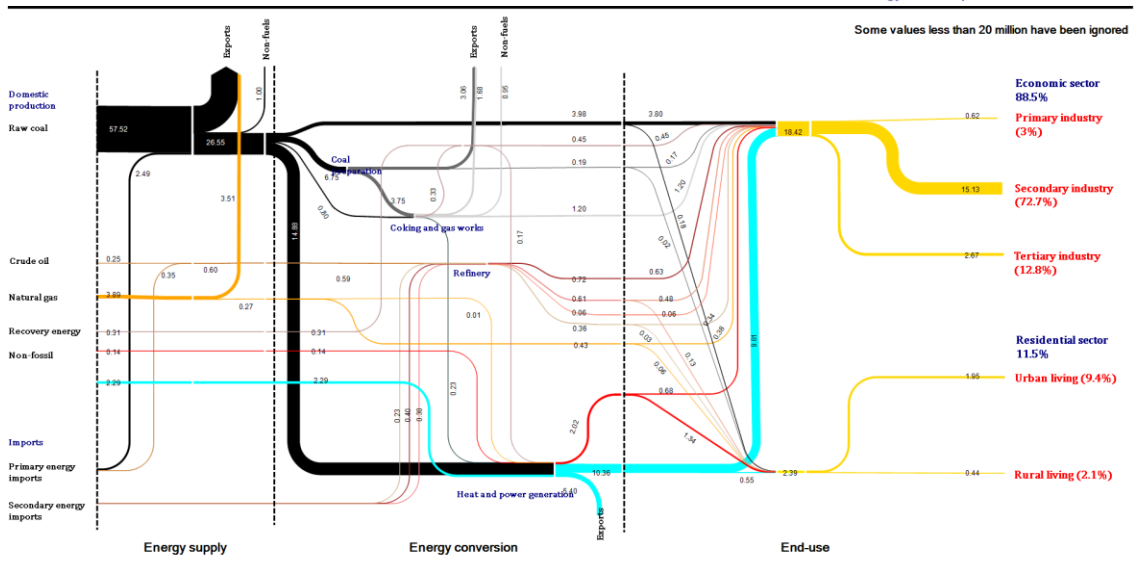

**Figure S.17.** Energy allocation Sankey diagram of Inner Mongolia in 2016.



Energy Allocation Sankey Diagram of Shanxi, China, 2016  
Unit:10 MILLION toe

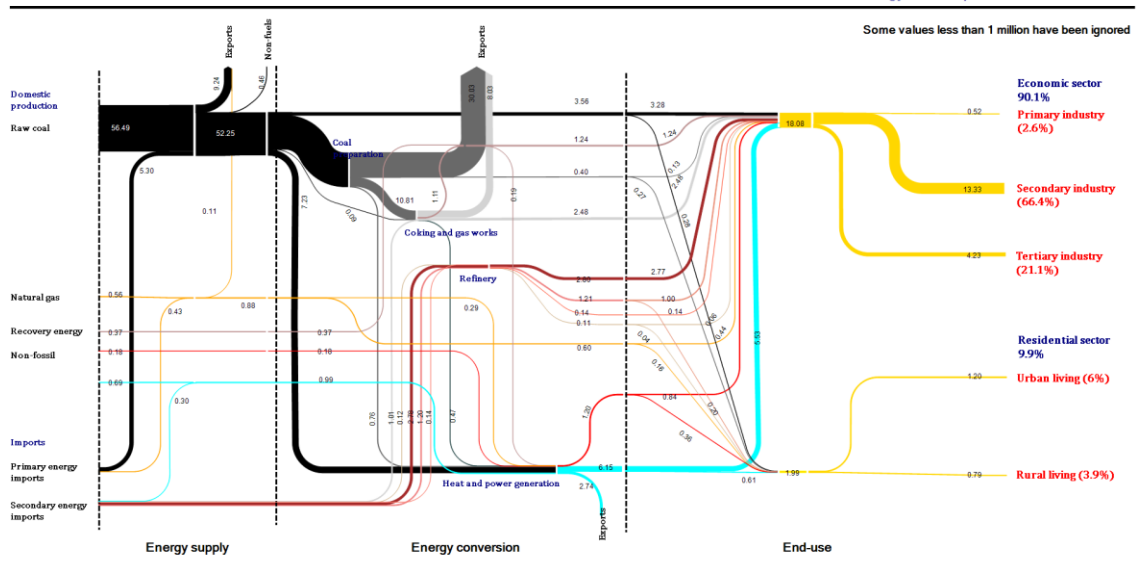

Figure S.18. Energy allocation Sankey diagram of Shanxi in 2016.

Energy Allocation Sankey Diagram of Shaanxi, China, 2016  
Unit:10 MILLION toe

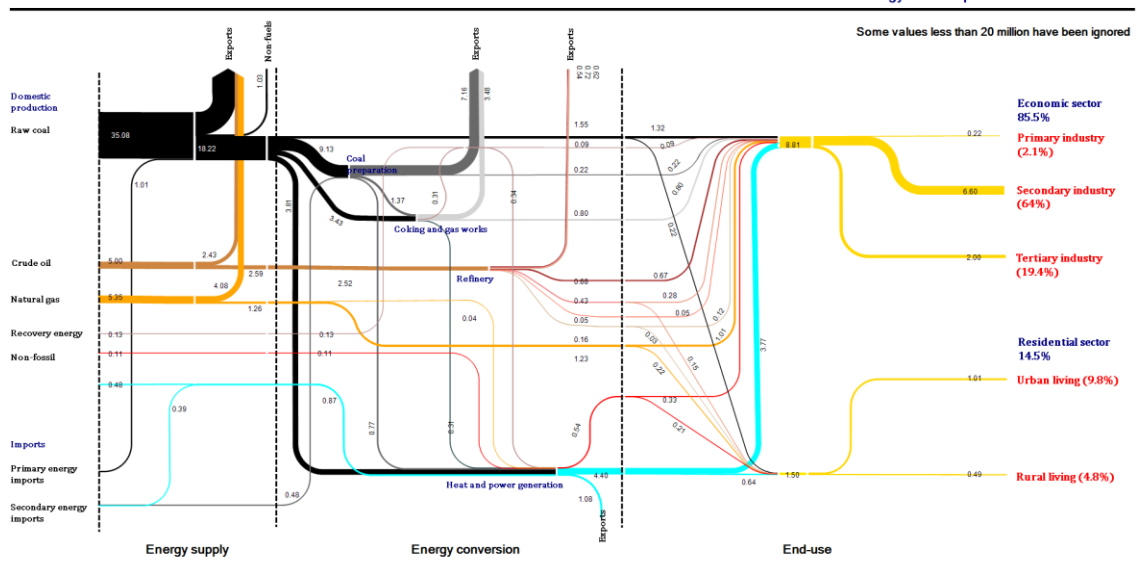

Figure S.19. Energy allocation Sankey diagram of Shaanxi in 2016.

Energy Allocation Sankey Diagram of Anhui, China, 2016  
Unit:10 MILLION toe

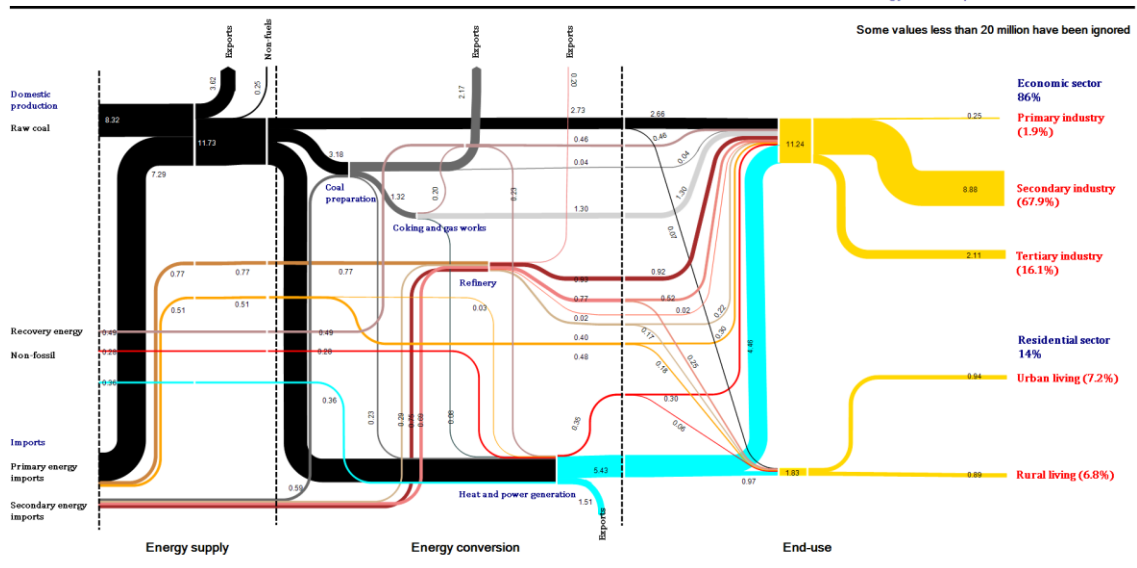

Figure S.20. Energy allocation Sankey diagram of Anhui in 2016.

Energy Allocation Sankey Diagram of Guizhou, China, 2016  
Unit:10 MILLION toe

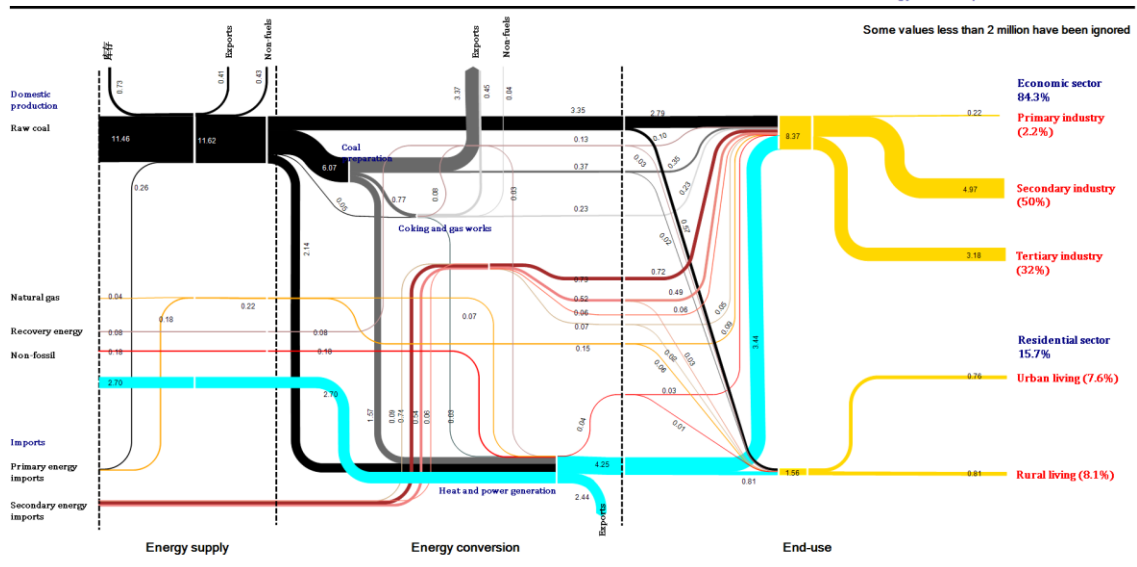

Figure S.21. Energy allocation Sankey diagram of Guizhou in 2016.

Energy Allocation Sankey Diagram of Gansu, China, 2016  
Unit:10 MILLION toe

Total Energy Consumption: 71.2 million toe

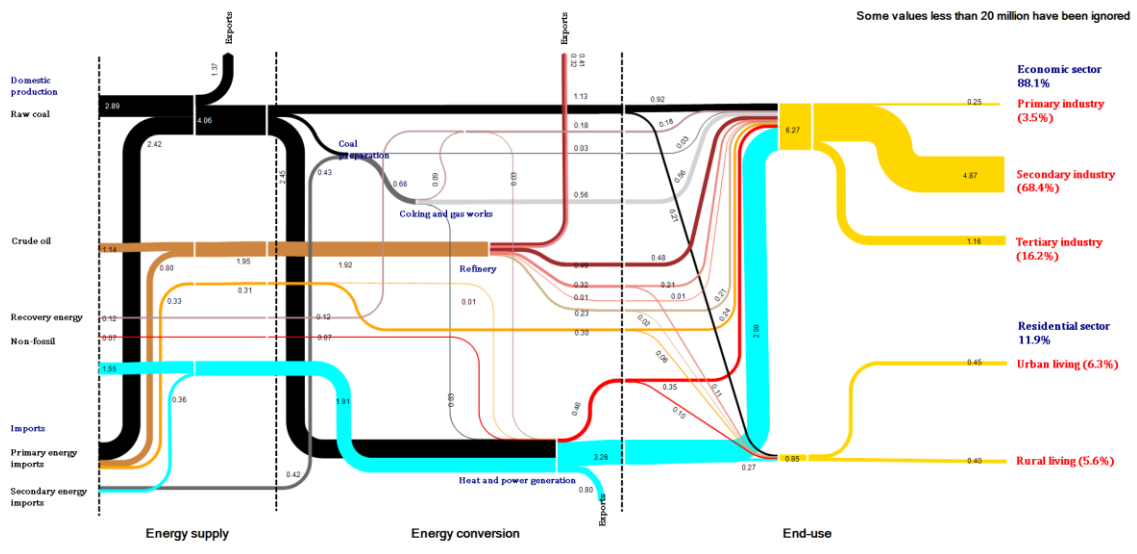

Figure S.22. Energy allocation Sankey diagram of Gansu in 2016.

Energy Allocation Sankey Diagram of Ningxia, China, 2016  
Unit:10 MILLION toe

Total Energy Consumption: 50.24 million toe

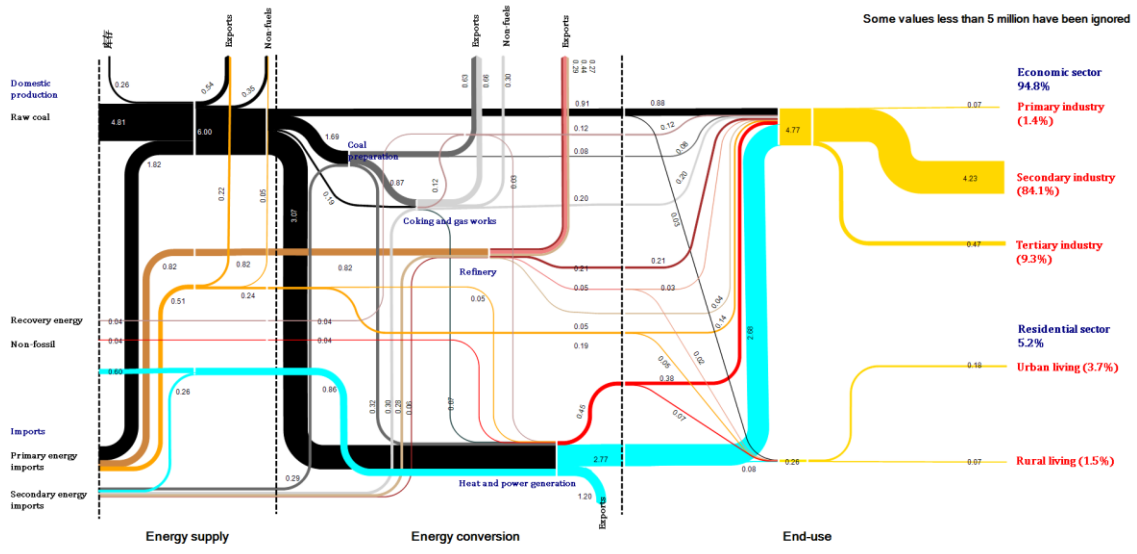

Figure S.23. Energy allocation Sankey diagram of Ningxia in 2016.

Energy Allocation Sankey Diagram of Xinjiang, China, 2016  
Unit:10 MILLION toe

Total Energy Consumption: 162.95 million toe

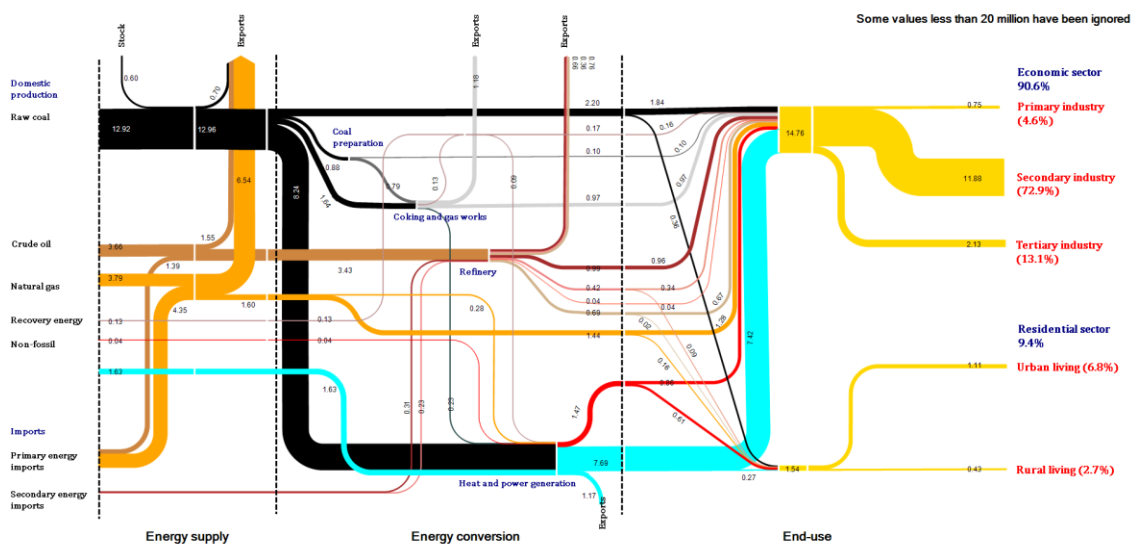

Figure S.24. Energy allocation Sankey diagram of Xinjiang in 2016.

Energy Allocation Sankey Diagram of Sichuan, China, 2016  
Unit:10 MILLION toe

Total Energy Consumption: 219.05 million toe

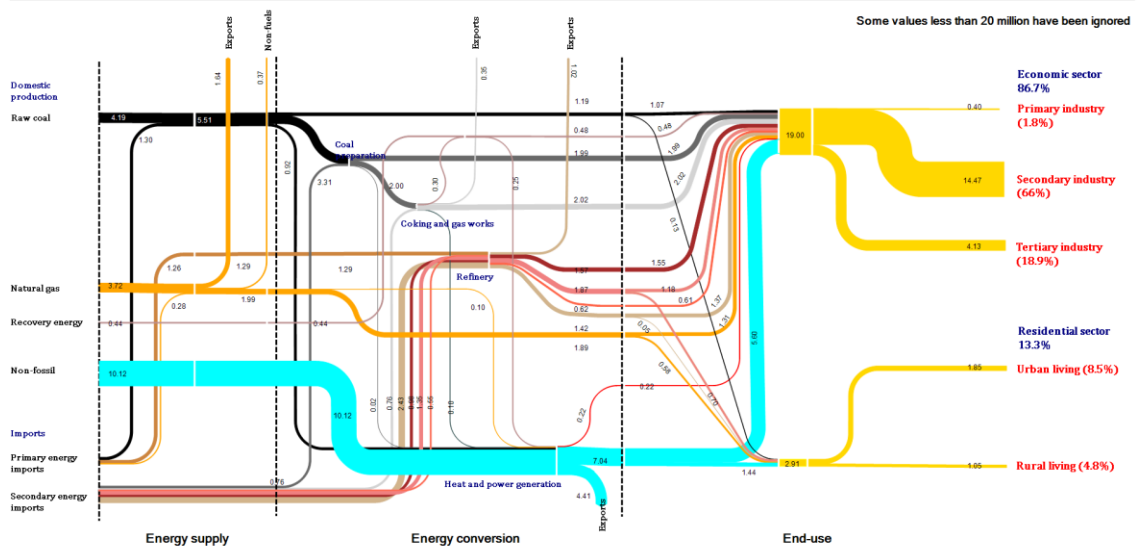

Figure S.25. Energy allocation Sankey diagram of Sichuan in 2016.

Energy Allocation Sankey Diagram of Yunnan, China, 2016  
Unit:10 MILLION toe

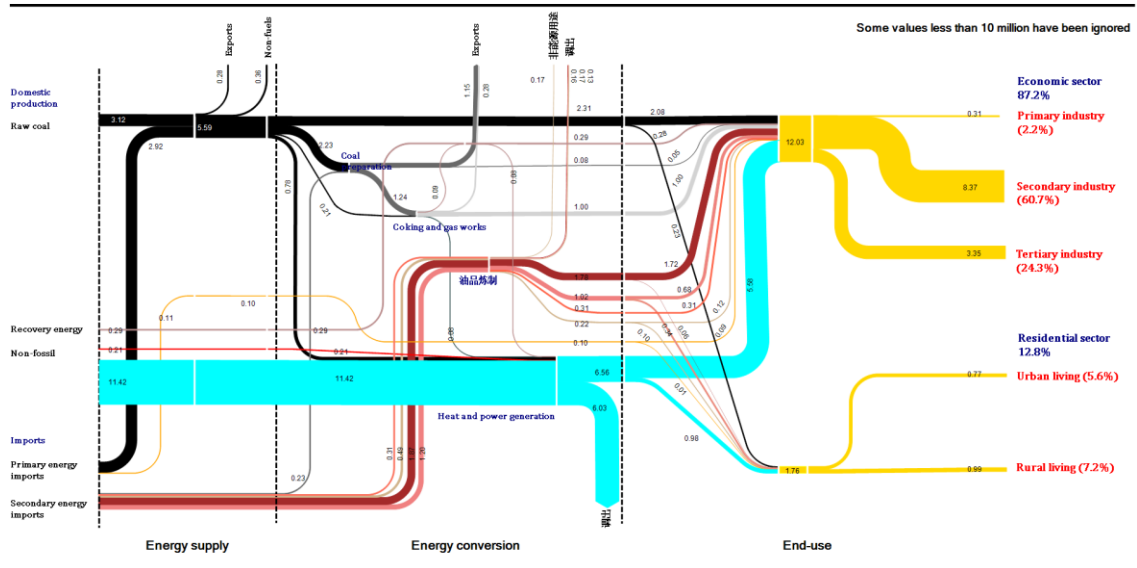

Figure S.26. Energy allocation Sankey diagram of Yunnan in 2016.

Energy Allocation Sankey Diagram of Qinghai, China, 2016  
Unit:10 MILLION toe

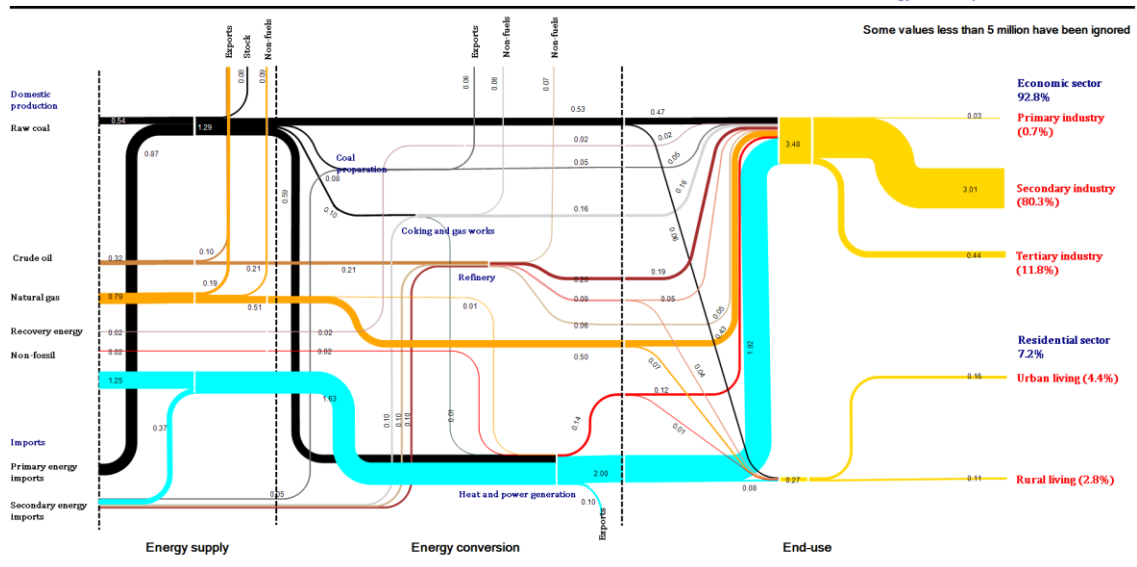

Figure S.27. Energy allocation Sankey diagram of Qinghai in 2016.

Energy Allocation Sankey Diagram of Hainan, China, 2016  
Unit:10 MILLION toe

Total Energy Consumption: 18.21 million toe

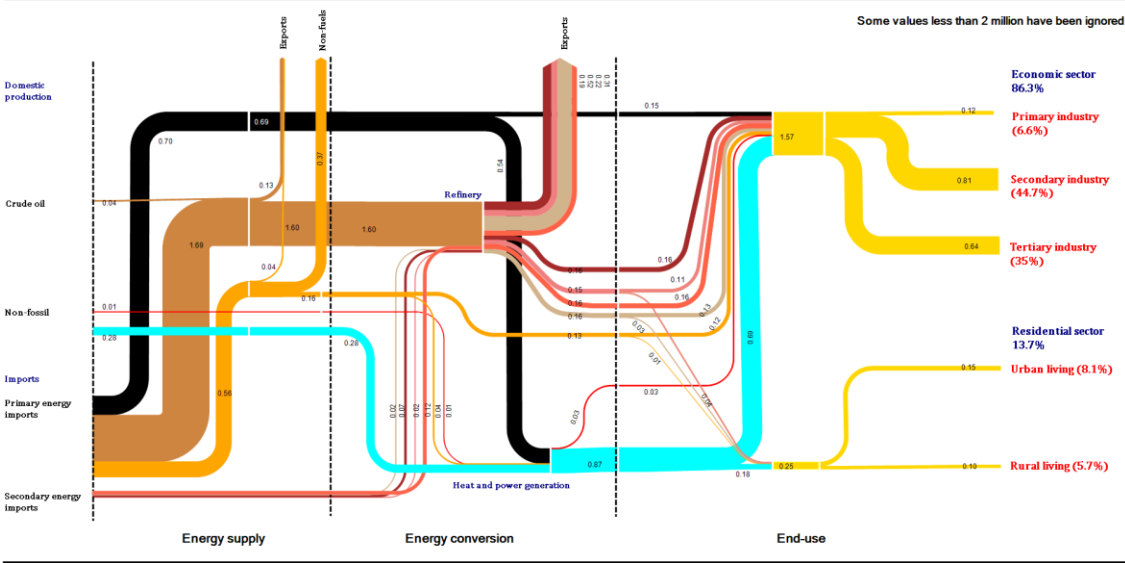

Figure S.28. Energy allocation Sankey diagram of Hainan in 2016.

Energy Allocation Sankey Diagram of Shanghai, China, 2016  
Unit:10 MILLION toe

Total Energy Consumption: 111.71 million toe

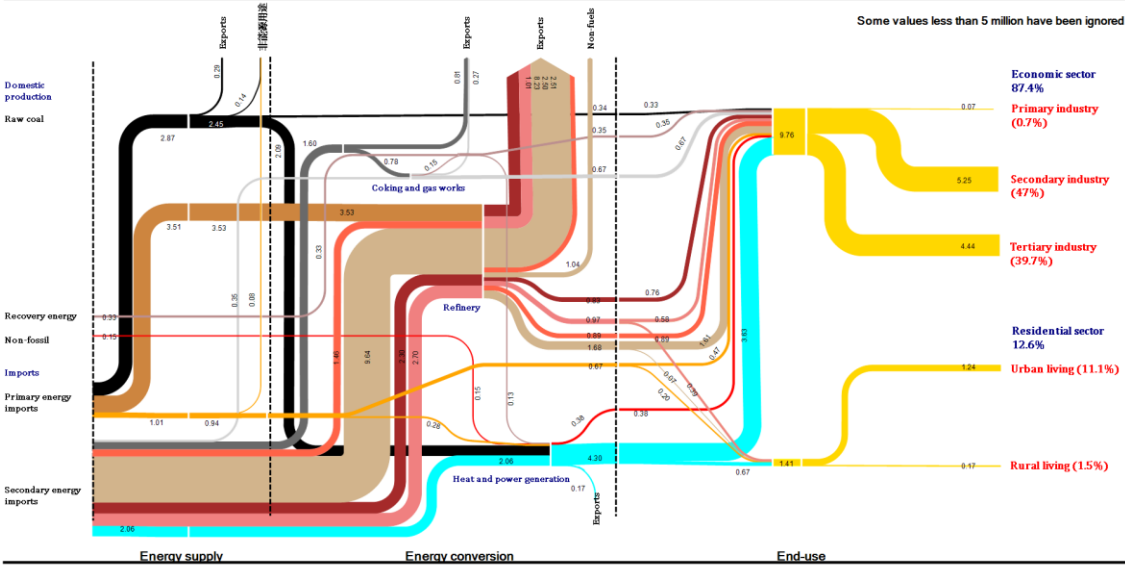

Figure S.29. Energy allocation Sankey diagram of Shanghai in 2016.

**Energy Allocation Sankey Diagram of Beijing, China, 2016**  
Unit: 10 MILLION toe

Total Energy Consumption: 63.25 million toe

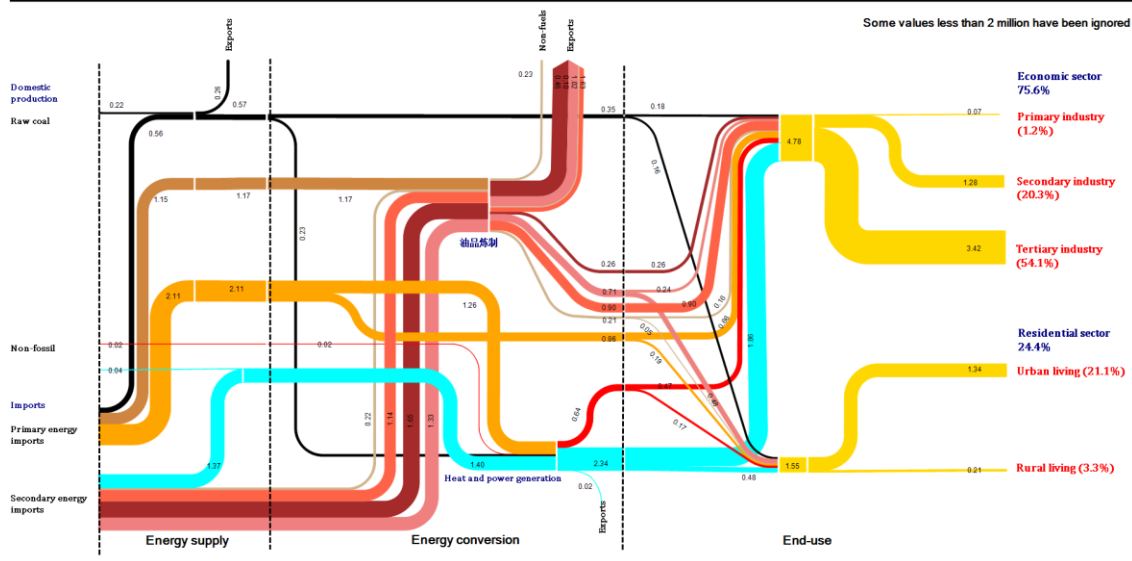

**Figure S.30.** Energy allocation Sankey diagram of Beijing in 2016.
